# Supplementary material
Source: publisher figshare collection journal article supplement (https://karger.figshare.com/ndownloader/files/28959576)
Supplement: Supplementary file 1 [file 28959576]

**Supplementary Table 2.** Search strategy

| **Search strategy (MEDLINE)** | |  |  |  |  |  | |
| --- | --- | --- | --- | --- | --- | --- | --- |
| 1 | muscle weakness/ or muscular atrophy/ or sarcopenia/ | | | | | | 22348 |
| 2 | (sarcopenia or "muscular atrophy" or "muscle weakness" or "muscular weakness").mp. [mp=title, abstract, original title, name of substance word, subject heading word, floating sub-heading word, keyword heading word, organism supplementary concept word, protocol supplementary concept word, rare disease supplementary concept word, unique identifier, synonyms] | | | | | | 46347 |
| 3 | 1 or 2 | | | | | | 46347 |
| 4 | (mortality* or survival* or mortal-ity or die or died).mp. [mp=title, abstract, original title, name of substance word, subject heading word, floating sub-heading word, keyword heading word, organism supplementary concept word, protocol supplementary concept word, rare disease supplementary concept word, unique identifier, synonyms] | | | | | | 2296677 |
| 5 | exp mortality/ | | | | | | 375953 |
| 6 | exp death/ | | | | | | 147090 |
| 7 | exp survival rate/ | | | | | | 169915 |
| 8 | (death adj3 rate).mp. [mp=title, abstract, original title, name of substance word, subject heading word, floating sub-heading word, keyword heading word, organism supplementary concept word, protocol supplementary concept word, rare disease supplementary concept word, unique identifier, synonyms] | | | | | | 17612 |
| 9 | 4 or 5 or 6 or 7 or 8 | | | | | | 2461141 |
| 10 | 3 and 9 | | | | | | 6622 |
| 11 | ((cell adj3 death) or (gene adj3 death) or (gene adj3 therapy) or (infant or newborn or fetus)).mp. [mp=title, abstract, original title, name of substance word, subject heading word, floating sub-heading word, keyword heading word, organism supplementary concept word, protocol supplementary concept word, rare disease supplementary concept word, unique identifier, synonyms] | | | | | | 1643426 |
| 12 | ("survival motor neuron" or "motor neuron death").mp. [mp=title, abstract, original title, name of substance word, subject heading word, floating sub-heading word, keyword heading word, organism supplementary concept word, protocol supplementary concept word, rare disease supplementary concept word, unique identifier, synonyms] | | | | | | 1674 |
| 13 | animals/ not humans/ | | | | | | 4652848 |
| 14 | (case report* or editorial or letter or review*).pt. | | | | | | 5948056 |
| 15 | 10 not (11 or 12 or 13 or 14) | | | | | | 2741 |
| 16 | limit 15 to english language | | | | | | 2536 |
| **Search strategy (EMBASE)** | |  |  |  |  |  | |
| 1 | *muscle weakness/ or *muscular atrophy/ or *sarcopenia/ | | | | | | 16265 |
| 2 | (sarcopenia or "muscular atrophy" or "muscle weakness" or "muscular weakness").ti,ab,kw. | | | | | | 50043 |
| 3 | 1 or 2 | | | | | | 57689 |
| 4 | (mortality* or survival* or mortal-ity or die or died).ti,ab,kw. | | | | | | 2617169 |
| 5 | exp *mortality/ | | | | | | 156765 |
| 6 | exp *death/ | | | | | | 139937 |
| 7 | exp *survival rate/ | | | | | | 7434 |
| 8 | (death adj3 rate).mp. [mp=title, abstract, heading word, drug trade name, original title, device manufacturer, drug manufacturer, device trade name, keyword, floating subheading word, candidate term word] | | | | | | 27318 |
| 9 | 4 or 5 or 6 or 7 or 8 | | | | | | 2750678 |
| 10 | 3 and 9 | | | | | | 8871 |
| 11 | ((cell adj3 death) or (gene adj3 death) or (gene adj3 therapy) or (infant or newborn or fetus)).ti,ab,kw. | | | | | | 750068 |
| 12 | ("survival motor neuron" or "motor neuron death").mp. [mp=title, abstract, heading word, drug trade name, original title, device manufacturer, drug manufacturer, device trade name, keyword, floating subheading word, candidate term word] | | | | | | 3644 |
| 13 | animals/ not humans/ | | | | | | 1374627 |
| 14 | (case report* or editorial or letter or review*).pt. | | | | | | 4358359 |
| 15 | 10 not (11 or 12 or 13 or 14) | | | | | | 5861 |
| 16 | limit 15 to english language | | | | | | 5472 |
| 17 | limit 16 to conference abstract status | | | | | | 2595 |
| 18 | 16 not 17 | | | | | | 2877 |
| **Search strategy (Cochrane Library (CENTRAL) )** | | | | |  |  | |
| 1 | muscle weakness/ or muscular atrophy/ or sarcopenia/ | | | | | | 1189 |
| 2 | (sarcopenia or "muscular atrophy" or "muscle weakness" or "muscular weakness").mp. [mp=ti, ab, tx, kw, ct, ot, sh, hw] | | | | | | 4729 |
| 3 | 1 or 2 | | | | | | 4729 |
| 4 | (mortality* or survival* or mortal-ity or die or died).mp. [mp=ti, ab, tx, kw, ct, ot, sh, hw] | | | | | | 200624 |
| 5 | exp mortality/ | | | | | | 13512 |
| 6 | exp death/ | | | | | | 2103 |
| 7 | exp survival rate/ | | | | | | 10350 |
| 8 | (death adj3 rate).mp. [mp=ti, ot, ab, tx, kw, ct, sh, hw] | | | | | | 3389 |
| 9 | 4 or 5 or 6 or 7 or 8 | | | | | | 202985 |
| 10 | 3 and 9 | | | | | | 765 |
| 11 | ((cell adj3 death) or (gene adj3 death) or (gene adj3 therapy) or (infant or newborn or fetus)).mp. [mp=ti, ot, ab, tx, kw, ct, sh, hw] | | | | | | 72597 |
| 12 | ("survival motor neuron" or "motor neuron death").mp. [mp=ti, ot, ab, tx, kw, ct, sh, hw] | | | | | | 62 |
| 13 | animals/ not humans/ | | | | | | 21 |
| 14 | (case report* or editorial or letter or review*).pt. | | | | | | 12143 |
| 15 | 10 not (11 or 12 or 13 or 14) | | | | | | 661 |
| 16 | limit 15 to english language [Limit not valid in CDSR,ACP Journal Club,DARE,CCA,CLCMR; records were retained] | | | | | | 494 |
